# Supplementary material
Source: publisher figshare collection journal article supplement (https://acs.figshare.com/ndownloader/files/25741941)
Supplement: Supplementary file 1 [file 25741941]

# Supporting Information

## Agonist and antagonist diverted twisting motions of single TRPV1 channel

Shoko Fujimura<sup>a</sup>, Kazuhiro Mio<sup>\*a,b</sup>, Masahiro Kuramochi<sup>a,c</sup>, Hiroshi

Sekiguchi<sup>d</sup>, Keigo Ikezaki<sup>c</sup>, Muneyo Mio<sup>a,b</sup>, Kowit Hengphasatporn<sup>e</sup>,

Yasuteru Shigeta<sup>e</sup>, Tai Kubo<sup>a,b</sup> & Yuji C. Sasaki<sup>\* a,c,d</sup>

*<sup>a</sup> AIST-UTokyo Advanced Operando-Measurement Technology Open*

*Innovation Laboratory (OPERANDO-OIL), National Institute of Advanced*

*Industrial Science and Technology (AIST), 6-2-3 Kashiwanoha, Chiba 277-*

*0882, Japan.*

*<sup>b</sup> Molecular Profiling Research Center for Drug Discovery, National Institute of*

*Advanced Industrial Science and Technology (AIST), 2-3-26 Aomi, Tokyo 135-*

*0064 Japan.*

*<sup>c</sup> Graduate School of Frontier Sciences, The University of Tokyo, 5-1-5*

*Kashiwanoha, Chiba 277-8561, Japan.*

<sup>d</sup> *Center for Synchrotron Radiation Research, Japan Synchrotron Radiation  
Research Institute, 1-1-1 Kouto, Sayo-cho, Hyogo 567-5198, Japan.*

<sup>e</sup> *Center for Computational Sciences, University of Tsukuba, 1-1-1 Tennodai,  
Tsukuba, Ibaraki 305-8577, Japan.*

## Supporting information

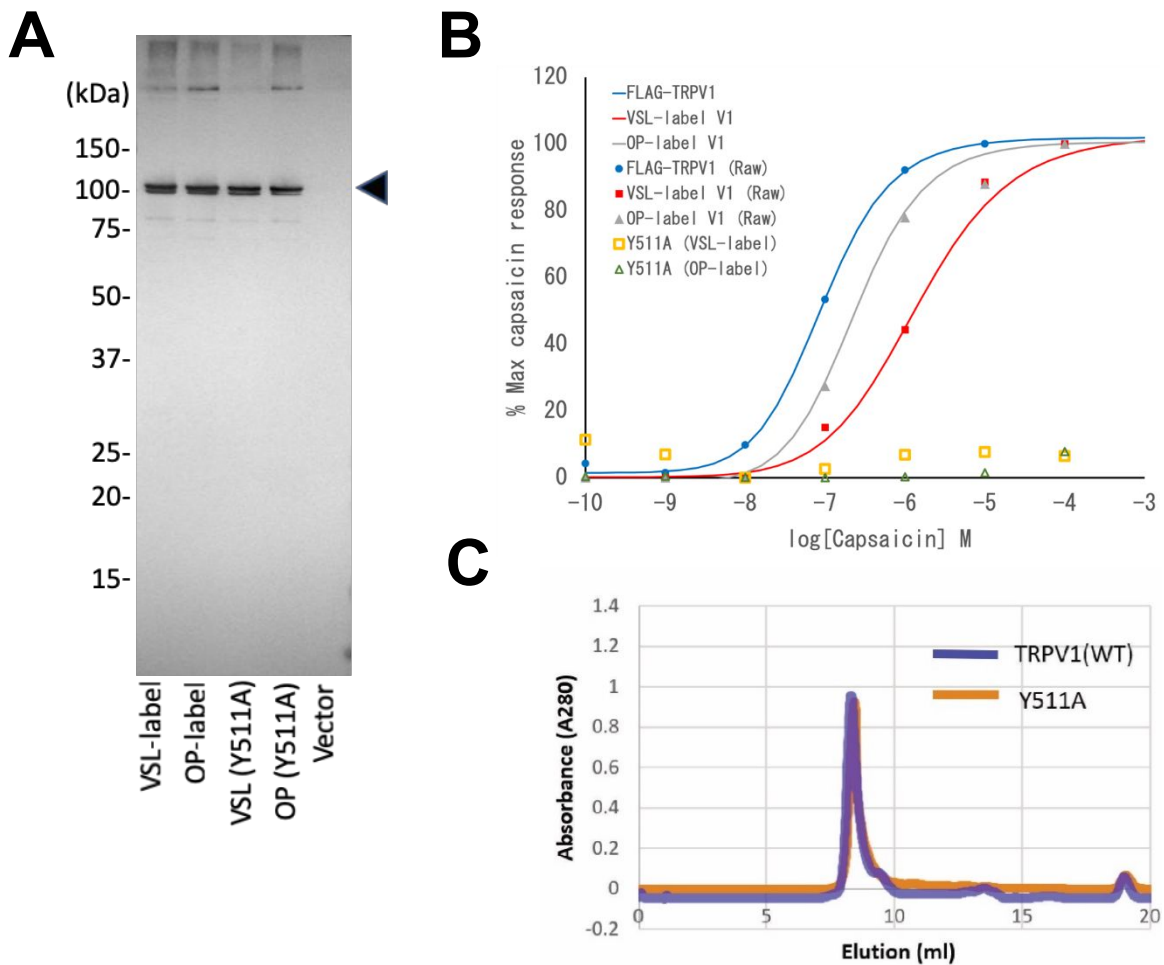

**Figure S1 | Expression and function of TRPV1 receptors used in this experiment.**

**(A)** Expression of VSL-label TRPV1, OP-label TRPV1, VSL-label Y511A mutant, and OP-label Y511A mutant on the HEK293 cells were confirmed by the Western blotting of the anti-FLAG antibodies. The right-end lane is a control transfection by the vector only. The arrowhead shows the position of TRPV1 receptors. **(B)** Responses to the capsaicin were tested by the calcium influx assay using the FlexStation 3 system with the FLIPR Calcium 6 reagent (Molecular Devices Inc.). Mean values of

2-4 independent measurements were plotted. EC<sub>50</sub> was 0.088  $\mu$ M (FLAG-TRPV1), 1.32  $\mu$ M (VSL-label TRPV1) and 0.245  $\mu$ M (OP-label TRPV1), respectively. (C) Gel-filtration profiles (Superdex 200 column) of TRPV1 purification. Buffer composition was; 20 mM Tris-HCl, pH 7.4, 150 mM NaCl, 50 mM MgCl<sub>2</sub>, 1 mM n-Decyl- $\beta$ -D-maltoside).

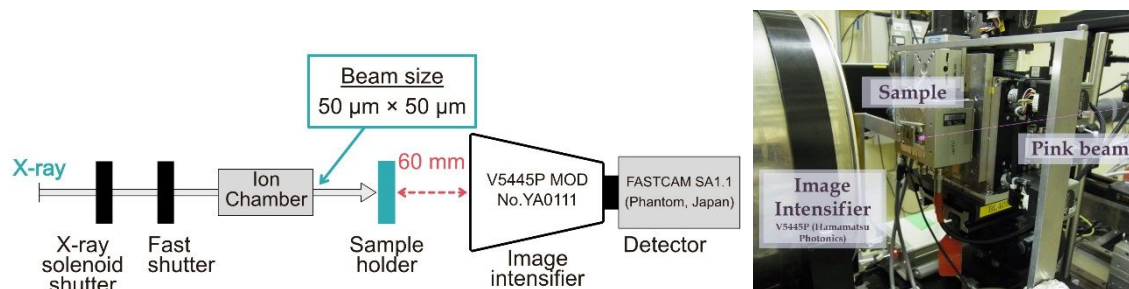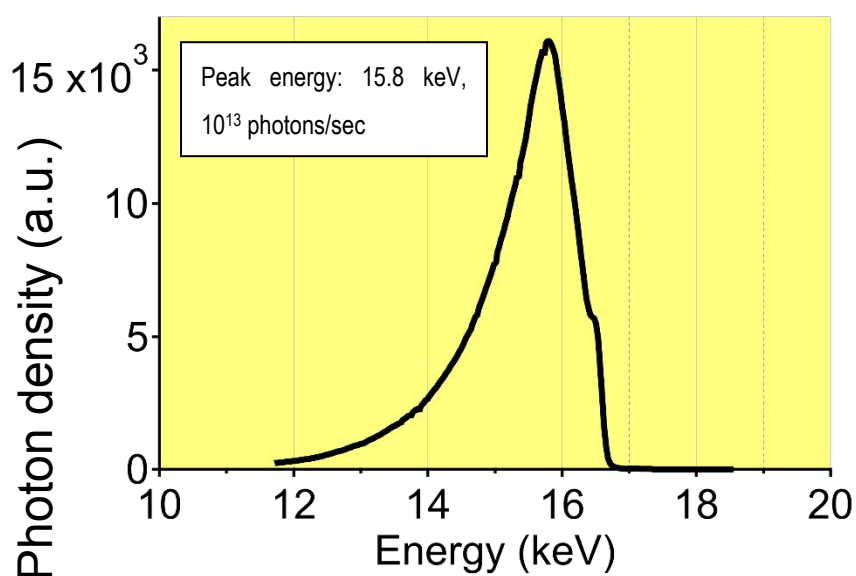

**Figure S2 | DXT measurement system (upper panels) and the energy profile of incident X-ray for the DXT measurement (lower panel)** X-rays from the beamline (BL40XU, SPring-8, Japan) with energy widths from 14.0-16.5 keV (undulator gap = 31.0 mm) were used for DXT measurements. The sample-to-detector distance was set 60 mm in our DXT measurement.

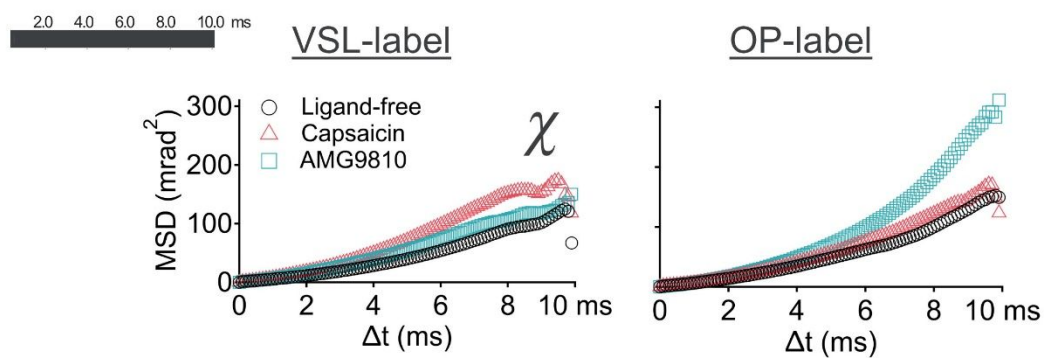

**Figure S3 | MSD curves of TRPV1 motion for the  $\chi$  axis up to 10 ms.**

The slopes were increased by capsaicin and AMG9810.

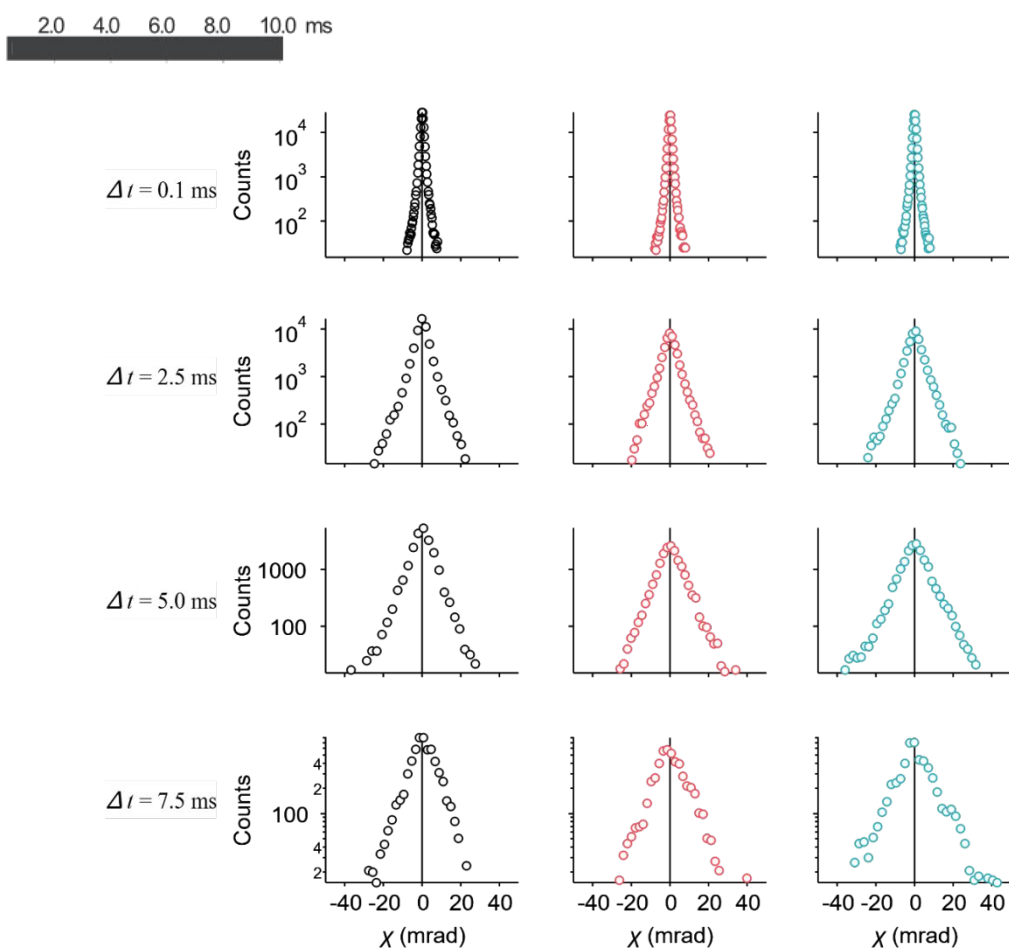

**Figure S4 | The VHC provide symmetric distribution for OP-label.**

Before classification of lifetime, the distribution were agreed well by Gaussian function at short time intervals ( $= 0.1$  ms) to large time intervals ( $= 7.5$  ms).

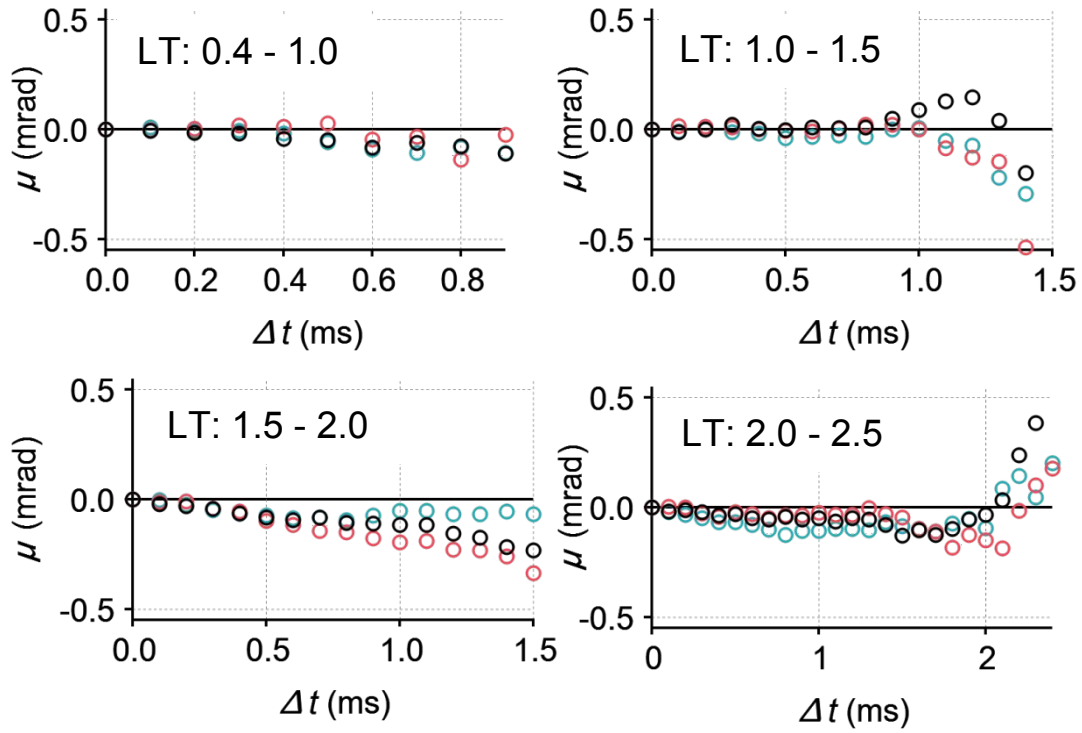

**Figure S5 | Mean-plot of the VSL-label for the further classified short (the lifetime (LT) < 2.5 ms) lifetime group.**

Different length of lifetime filtering was further applied to the short lifetime group (LT < 2.5 ms), and the mean-plots of subgroups were calculated. Rotational motion of the subgroups was also confirmed to be non-biased as shown in the result from the short lifetime group (Fig. 3A). Applied lifetime filtering is shown at upper left of each panel.



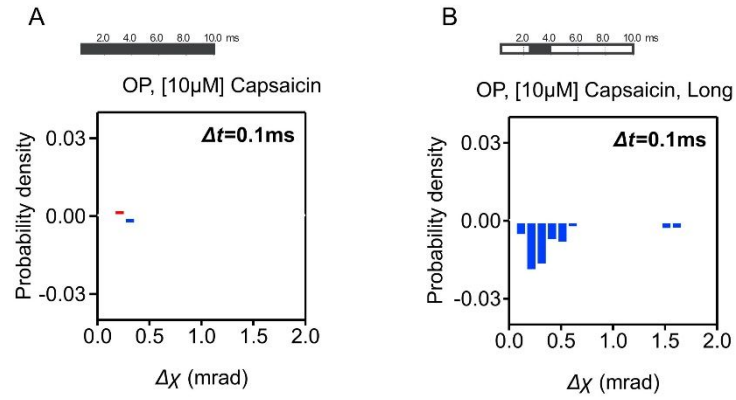

**Figure S6** | Subtraction in the probability density between the positive value and the negative value for OP-label at  $\Delta t = 0.1$  ms.

**(A)** Subtraction of the probability density for all detected trajectories group ( $0.4 \leq \text{lifetime (LT)} < 10$  ms) with capsaicin. **(B)** Subtraction of the probability density for long ( $2.5 \leq \text{LT} < 4$  ms) with capsaicin. Comparing with long LT group which shows significant negative difference, all detected trajectories group didn't show any obvious rotational bias.

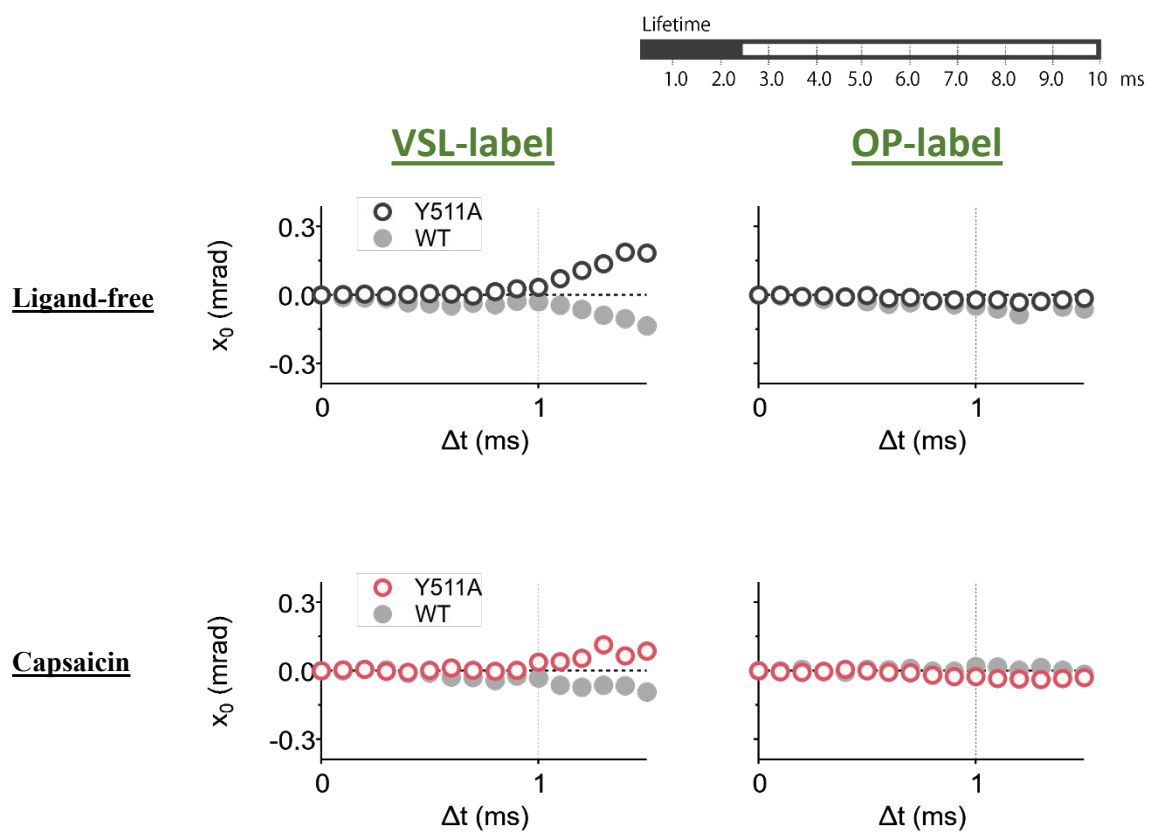

**Figure S7 | The mean plots of the WT and Y511A against capsaicin for the short lifetime group (LT < 2.0 ms).**

Like the motion observed in the WT (Fig. 3A), Y511A in the short lifetime groups also did not show any specific rotational bias. Dark-filled area of the top right bar shows the applied lifetime periods.

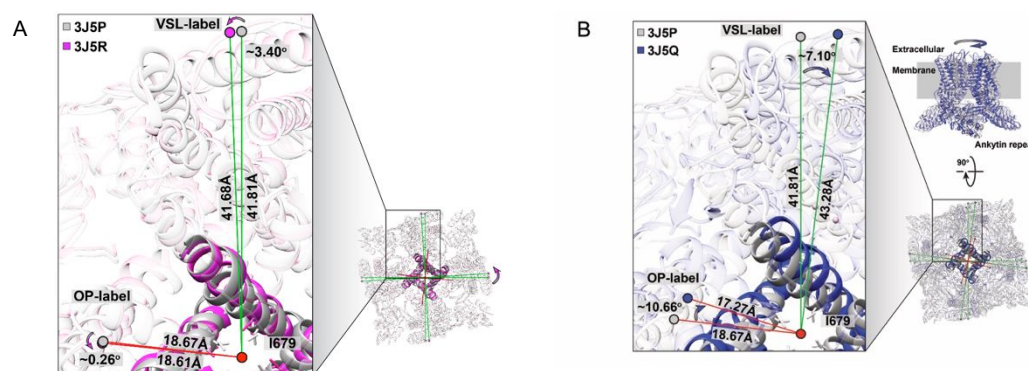

**Figure S8 | Superimposed views of closed and open-form of TRPV1.**

(A) The ankyrin repeats domain at residues 111-143 was held as a fulcrum, and the structures were viewed and compared from the extracellular side. Apo (PDB: 3J5P, gray) and capsaicin-bound partially open (3J5R, magenta) structures were superimposed. (B) Apo- (PDB: 3J5P, grey) and DkTx/RTX-bound full-open (3J5Q, blue) structures were superimposed (reposted from the Fig. 5B). No significant conformational change was shown both at the OP- and VSL- positions by capsaicin, while the DkTx/RTX, which induces full-open structure, generated the CW rotation biases. Positions of OP (Gly 602)- and VSL (Tyr 463)- labels were indicated by circles.

**VSL-label**

|                                             | Ligand-free<br>(10,465) | Capsaicin<br>(8,026) | AMG9810<br>(10,578) |
|---------------------------------------------|-------------------------|----------------------|---------------------|
| $D_\alpha$<br>( $\text{mrad}^2/\text{ms}$ ) | 4.03                    | 5.88                 | 5.68                |
| $\alpha$                                    | 1.37                    | 1.51                 | 1.38                |
| $\beta^2$<br>( $\text{mrad}^2$ )            | 0.59                    | 0.86                 | 0.53                |

**OP-label**

|                                             | Ligand-free<br>(12,108) | Capsaicin<br>(10,660) | AMG9810<br>(11,090) |
|---------------------------------------------|-------------------------|-----------------------|---------------------|
| $D_\alpha$<br>( $\text{mrad}^2/\text{ms}$ ) | 4.30                    | 4.39                  | 4.61                |
| $\alpha$                                    | 1.49                    | 1.57                  | 1.68                |
| $\beta^2$<br>( $\text{mrad}^2$ )            | 0.75                    | 0.83                  | 0.85                |

**Table S1| Parameter of MSD for wild type of TRPV1**

The MSD curve were fitted by the following function:  $\delta^2(t) = D_\alpha t^\alpha + 2\beta^2$  on the range of 0–4 ms.

$D_\alpha$  is the anomalous diffusion constant, a non-linear relationship to time,  $\alpha$  called subdiffusion ( $1 > \alpha > 0$ ) or superdiffusion ( $\alpha > 1$ ) and  $\beta$  called measurement error.

|                                       | short         | middle        | long         |
|---------------------------------------|---------------|---------------|--------------|
|                                       | LF:0.4-2.5 ms | LF:2.6-4.0 ms | LF:8.0-10 ms |
| $D_\alpha$<br>(mrad <sup>2</sup> /ms) | 9.87          | 7.30          | 5.04         |
| $\alpha$                              | 1.27          | 1.40          | 1.39         |
| $\beta^2$<br>(mrad <sup>2</sup> )     | 0.59          | 0.46          | 0.29         |

**Table S2| Parameter of MSD for each Lifetime group in OP-label with capsaicin**

The MSD curve were fitted by the following function:  $\delta^2(t) = D_\alpha t^\alpha + 2\beta^2$  on the range of 0–2 ms.

$D_\alpha$  is the anomalous diffusion constant, a non-linear relationship to time,  $\alpha$  called subdiffusion ( $1 > \alpha > 0$ ) or superdiffusion ( $\alpha > 1$ ) and  $\beta$  called measurement error.
